# Supplementary material for: Chitinase-3-like Protein 1 Is Associated with Poor Virologic Control and Immune Activation in Children Living with HIV
Source: MDPI journal article supplement (doi:10.3390/v14122602), 2022-11-23
Supplement: s1 [file s1]

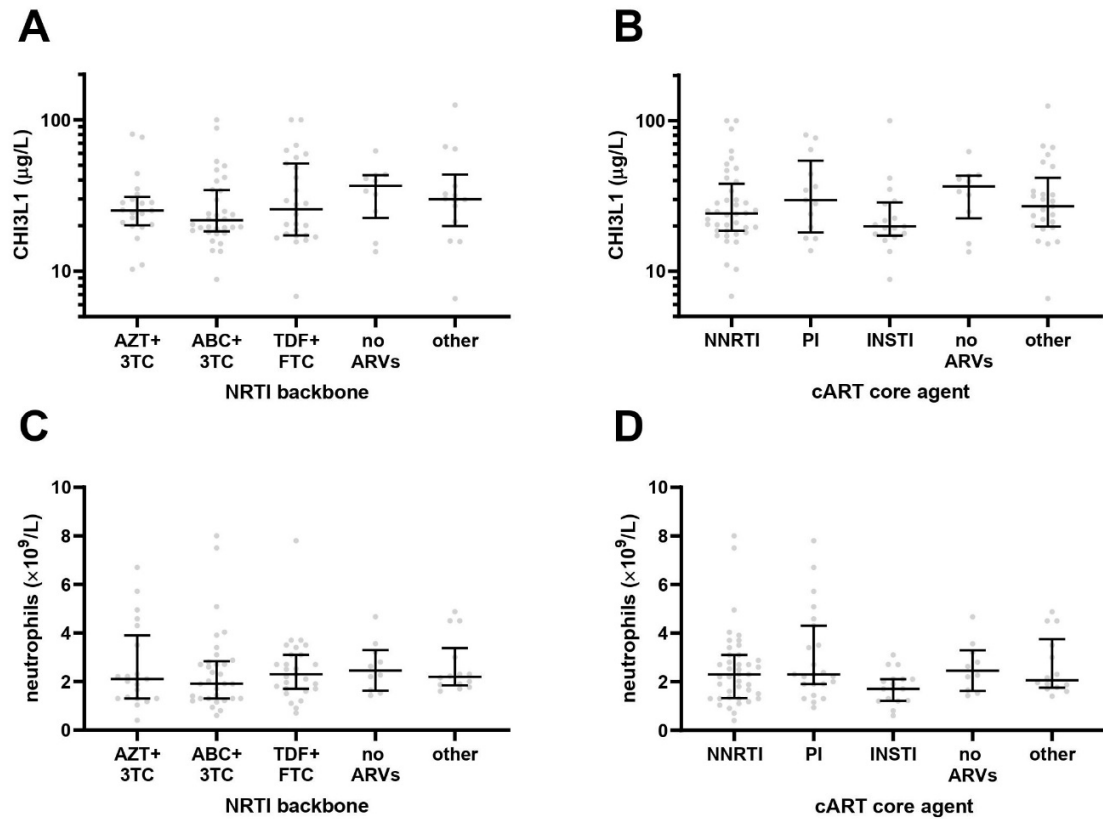

**Figure S1. cART regimen is not associated with differences in CHI3L1 and neutrophil count.** **A.** CHI3L1 levels ( $p=0.45$ ) and **B.** neutrophil counts ( $p=0.78$ ) did not differ significantly between NRTI backbone combinations. AZT, zidovudine; ABC, abacavir; 3TC, lamivudine; TDF, tenofovir; FTC, emtricitabine. Other NRTI components of the cART regimen included: ABC+TDF+FTC ( $n=1$ ); ABC+TDF+3TC ( $n=1$ ); ABC+AZT ( $n=2$ ); ABC ( $n=2$ ); 3TC ( $n=2$ ); AZT ( $n=1$ ); no NRTI in cART regimen ( $n=2$ ); and unknown ( $n=5$ ). **C.** CHI3L1 levels ( $p=0.27$ ) and **D.** neutrophil counts ( $p=0.13$ ) did not differ significantly between cART regimen, according to core agent. NNRTI, non-nucleoside reverse transcriptase inhibitor, PI, protease inhibitor (includes ritonavir-boosted PIs); INSTI, integrase strand-transfer inhibitor.
